# Supplementary material for: Protein-resistant monolayers prepared by hydrosilylation of α-oligo(ethylene glycol)-ω-alkenes on hydrogen-terminated silicon (111) surfaces
Source: Royal Society of Chemistry journal article supplement (doi:10.1039/b401499e), 2004-01-01
Supplement: b401499e.pdf [file b401499e.pdf]

# Supplementary Material (ESI) for Chemical Communications  
# This journal is © The Royal Society of Chemistry 2004

## **Protein-resistant Monolayers Prepared by Hydrosilylation of $\alpha$ -Oligo(ethylene glycol)- $\omega$ -alkenes on Hydrogen-terminated Silicon (111) Surfaces**

**Chi Ming Yam,<sup>a</sup> Juan Manuel Lopez-Romero,<sup>b</sup> Jianhua Gu<sup>a</sup> and Chengzhi Cai<sup>\*a</sup>**

<sup>a</sup> *Department of Chemistry, and Center for Materials Chemistry, University of Houston, Houston, Texas 77204. Fax: 713 743 2709; Tel: 713 743 2710; E-mail: [cai@uh.edu](mailto:cai@uh.edu)*

<sup>b</sup> *On leave from Dept. Quimica Organica, Universidad de Malaga, Malaga-29071, Spain.*

### **Supplementary Information**

## I. Synthesis of EG<sub>6</sub>, EG<sub>9</sub>

Scheme 1. Synthetic Route to EG<sub>6</sub> and EG<sub>9</sub>.

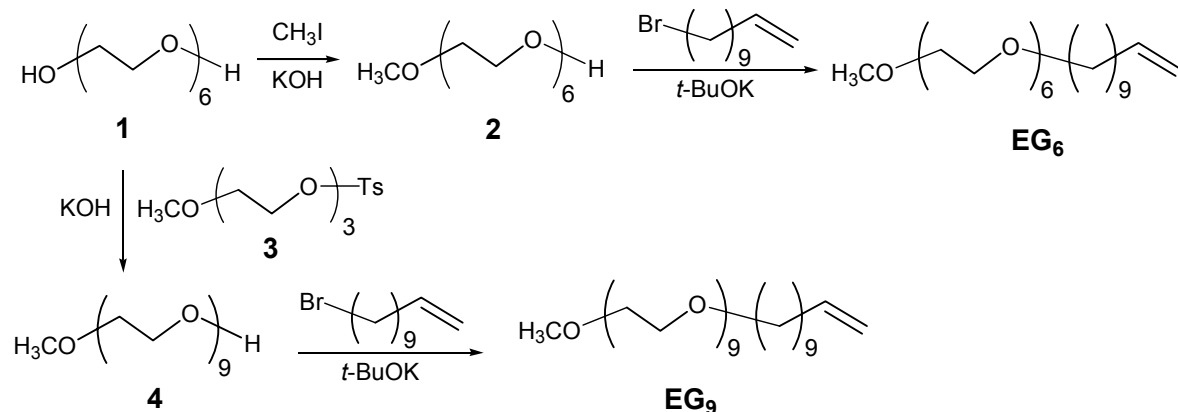

*Hexaethylene glycol monomethyl ether (2).*<sup>1</sup> A suspension of hexa(ethylene glycol) (**1**, 5.64 g, 20.0 mmol, 4 eq) and KOH (0.28 g, 5.00 mmol, 1 eq) in THF (20 mL) was refluxed until KOH was dissolved. The solution was cooled to r.t., treated with CH<sub>3</sub>I (0.37 mL, 6.0 mmol, 1.2 eq), and stirred for 24 h at r.t. The mixture was dried under vacuum. After addition of chloroform, the organic layer was washed with water (2 x 50 mL), dried over Na<sub>2</sub>SO<sub>4</sub>, concentrated under reduced pressure, and dried under high vacuum to give **2**<sup>1</sup> as a pale-yellow oil (0.45 g, 31%).

*Hexaethylene glycol methyl ωundecenyl ether (EG<sub>6</sub>).*<sup>1</sup> A mixture of *t*-BuOK (0.665 g, 5.9 mmol), **2** (1.47g, 4.95 mmol), tetrabutylammonium iodide (10 mg, 0.027 mmol), and 11-bromo-undec-1-ene (2.31g, 9.9 mmol) in THF (10 mL) was stirred at 70 °C for 12 h, cooled to r.t., and extracted with Et<sub>2</sub>O, washed with water (2 x 15 mL), dried over MgSO<sub>4</sub>, and concentrated. Flash chromatography (CH<sub>2</sub>Cl<sub>2</sub>/MeOH 250:3) gave EG<sub>6</sub> as a colorless oil (1.84g, 83%). <sup>1</sup>H NMR (CDCl<sub>3</sub>): δ 1.29 (br. s, 12H), 1.85 (m, 2H), 2.03 (br q, *J* = 6.5, 2H), 3.37 (s, 3H, s), 3.53 (t, *J* = 6.5, 2H), 3.5–3.7 (m, 24H), 4.89–5.02 (m, 2H), 5.74–5.87 (m, 1H); <sup>13</sup>C NMR (CDCl<sub>3</sub>) δ 25.96, 28.80, 28.99, 29.31, 29.35, 29.41, 29.49, 33.69, 58.92, 69.91, 70.41, 70.46, 71.42, 71.81, 113.97, 139.11; ESIMS *m/z* 471 (M+Na<sup>+</sup>).

*Nonaethylene glycol monomethyl ether (4).*<sup>2</sup> A mixture of dry hexa(ethylene glycol) **1** (14.5 g, 51.3 mmol) and KOH (0.78 g, 14 mmol) in THF (20 mL) was refluxed until KOH was dissolved. The solution was cooled to r.t., treated with the tosylate **3**<sup>3</sup> (4.08 g, 12.8 mmol), and refluxed for

18 h. The solvent was removed under vacuum,  $\text{CHCl}_3$  was added and the organic phase was washed with water (2 x 50 mL), dried over  $\text{Na}_2\text{SO}_4$ , concentrated under reduced pressure, and dried under high vacuum to give **4**<sup>2</sup> as a pale yellow oil (6.2 g, 92 %).

*Hexaethylene glycol methyl undecenyl ether (EG<sub>9</sub>)*. Similar to the preparation of **EG<sub>6</sub>**, **EG<sub>9</sub>** was obtained as oil in 85% yield. <sup>1</sup>H NMR ( $\text{CDCl}_3$ ):  $\delta$  1.20 (br. s, 12H), 1.56 (m, 2H), 2.02 (br q,  $J = 6.6$ , 2H), 3.37 (s, 3H), 3.44 (t,  $J = 6.6$ , 2H), 3.5–3.7 (m, 36H), 4.90–5.02 (m, 2H), 5.74–5.88 (m, 1H); <sup>13</sup>C NMR ( $\text{CDCl}_3$ )  $\delta$  25.96, 28.80, 29.00, 29.32, 29.35, 29.41, 29.50, 33.70, 58.94, 69.92, 70.45, 71.41, 71.80, 113.99, 139.13; ESIMS  $m/z$  603 ( $\text{M} + \text{Na}^+$ ).

## II. Setting and Procedure for Photo-induced Surface Hydrosilylation.

The apparatus was prepared by fusion of the open end of a five-side-polished quartz cell with the open bottom of a Schlenk tube (Figure S1). It was cleaned with Piranha solution ( $\text{H}_2\text{SO}_4/30\% \text{H}_2\text{O}_2$  3:1) at 80 °C for 30 min (*Caution: Piranha reacts violently with organic compounds, and care should be taken while handling it*), washed thoroughly with Millipore water, covered with aluminum foil and dried in a clean oven at 150°C. Atomically flat H-Si(111) surfaces were prepared similarly to the procedure described in literatures.<sup>4,5</sup> Briefly, single side polished and (111) oriented silicon wafers were cut into pieces of ca. 1x1 cm<sup>2</sup>, cleaned with Piranha solution ( $\text{H}_2\text{SO}_4/30\% \text{H}_2\text{O}_2$  3:1) at 80 °C for 30 min, thoroughly washed with Millipore water, etched in 10% buffer-HF (Transene) for 5 min and then in 40%  $\text{NH}_4\text{F}$  for 15 min under  $\text{N}_2$  purge, and dried immediately with a flow of nitrogen. The substrate was immediately placed inside a freshly cleaned and dried quartz cell, and tilted with the polished H-Si(111) surface facing downward (Figure 1). A droplet (~1-3 mg) of the alkene in a pipette was carefully placed on the quartz window below the wafer but without touching it. After the cell was degassed at  $\sim 10^{-4}$  mbar for 30 min, the substrate was allowed to fall down (by lightly tapping the cell) onto the droplet, forming a thin and homogeneous layer between the H-Si(111) surface and the quartz wall (Figure 1). The H-Si(111) surface was illuminated for 30 min with a hand-held 254 nm UV-lamp (Model UVLS-28, UVP) placed ~1 cm away from the cell. The sample was taken out and washed sequentially with petroleum ether, ethanol, and dichloromethane, followed by drying with a stream of  $\text{N}_2$  gas.

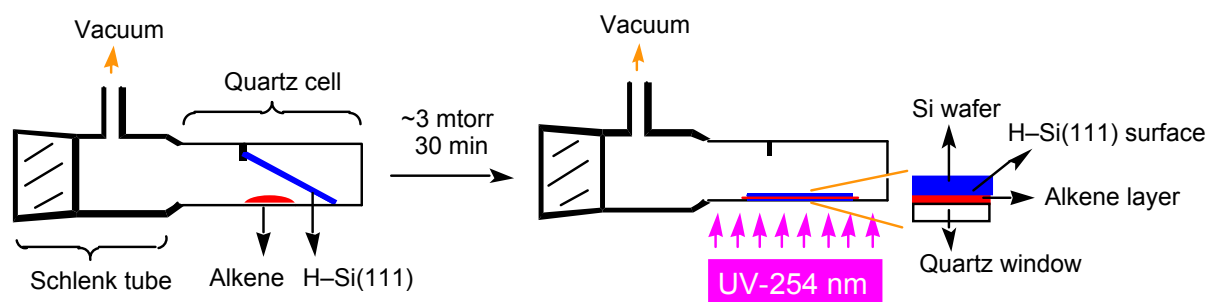

**Fig. S1** Experimental Setup for Photo-induced Hydrosilylation on H-Si(111) Surfaces.

## References

- 1) P. Fischer and C. Schmidt, H. Finkelmann, *Macromol. Rapid Commun.*, 1995, **16**, 435.
- 2) C. Campbell, K. Viras, A. J. Masters, J. R. Craven, Z. Hao, S. G. Yeates and C. Booth, *J. Phys. Chem.*, 1991, **95**, 4647.
- 3) C. Selve, J.-C. Ravey, M.-J. Stebe, C. El Moudjahid, E. M. Moumni and J.-J. Delpuech, *Tetrahedron*, 1991, **47**, 411.
- 4) M. A. Hines, *Int. Revs. Phys. Chem.*, 2001, **20**, 645.
- 5) C. P. Wade and C. E. D. Chidsey, *Appl. Phys. Lett.*, 1997, **71**, 1679.

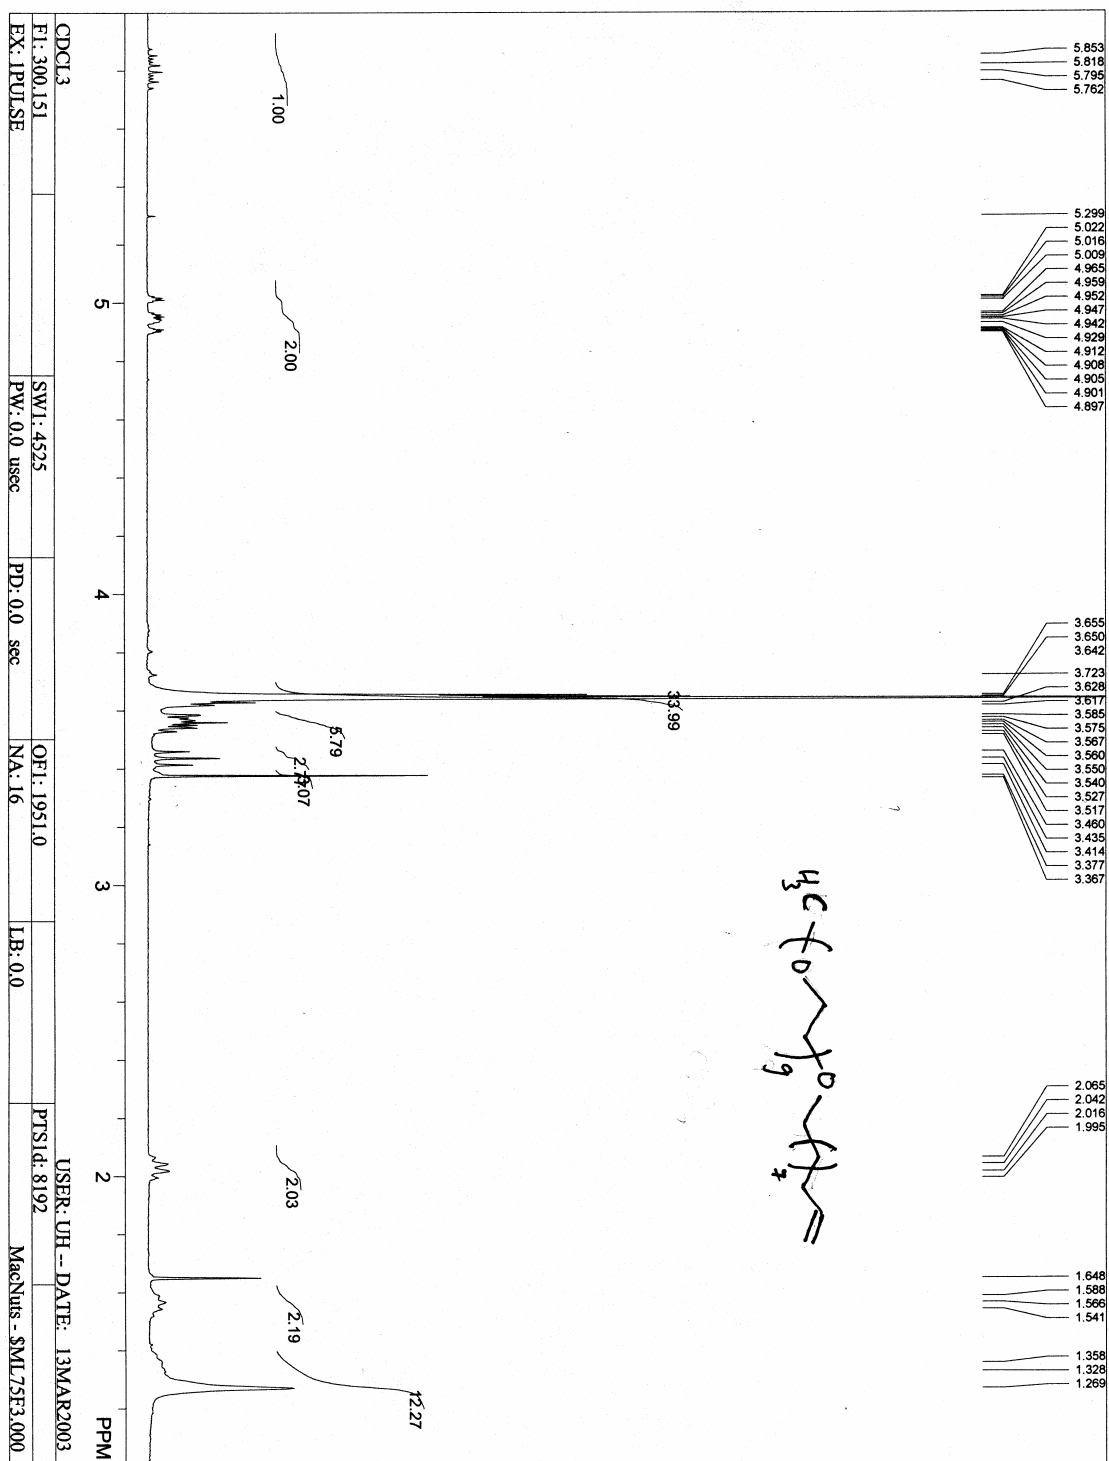

# Supplementary Material (ESI) for Chemical Communications  
# This journal is © The Royal Society of Chemistry 2004

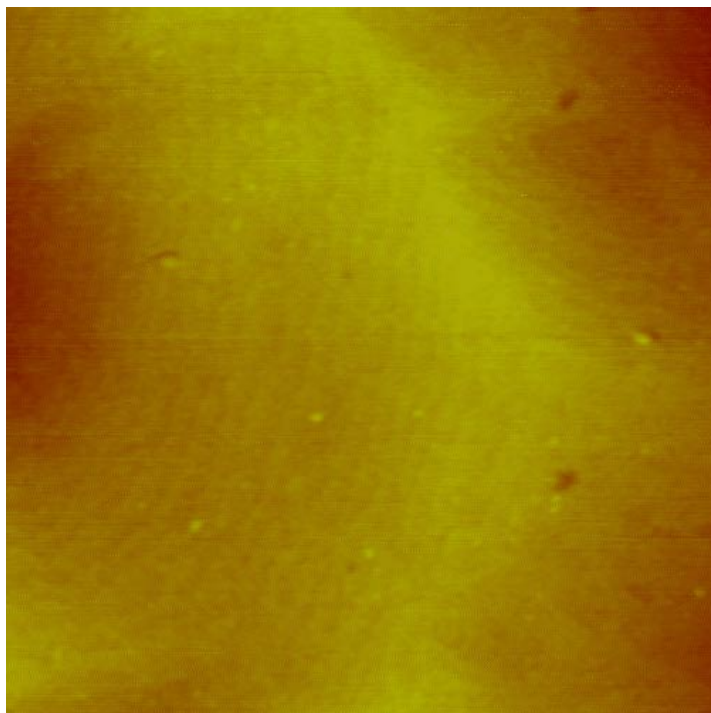

**Contact-mode AFM image ( $1 \times 1 \mu\text{m}^2$ , 10 nm contrast) of a EG<sub>9</sub> film on Si(111)**
